# Supplementary material
Source: ML conference proceedings conference paper supplement (https://proceedings.neurips.cc/paper_files/paper/2016/hash/7884a9652e94555c70f96b6be63be216-Abstract.html)
Supplement: Supplementary file 1 [file 7884a9652e94555c70f96b6be63be216-Supplemental.zip]

## A Using submodularity to perform projections

While solving (6) is NP-hard in general, the authors in [3] showed that it can be approximately solved using methods from submodular function optimization, which we quickly recap here. First, (6) can be cast in the following equivalent way:

$$\hat{G} = \arg \max_{|\hat{G}| \leq k} \left\{ \sum_{i \in I} g_i^2 : I = \cup_{G \in \hat{G}} G \right\} \quad (8)$$

Once we have  $\hat{G}$ ,  $\hat{\mathbf{u}}$  can be recovered by simply setting  $\hat{\mathbf{u}}_I = \mathbf{g}_I$  and 0 everywhere else, where  $I = \cup_{G \in \hat{G}} G$ . Next, we have the following result

**Lemma A.1.** *Given a set  $S \in [p]$ , the function  $z(S) = \sum_{i \in S} \mathbf{x}_i^2$  is submodular.*

*Proof.* First, recall the definition of a submodular function:

**Definition A.2.** *Let  $Q$  be a finite set, and let  $z(\cdot)$  be a real valued function defined on  $\Omega^Q$ , the power set of  $Q$ . The function  $z(\cdot)$  is said to be submodular if*

$$z(S) + z(T) \geq z(S \cup T) + z(S \cap T) \quad \forall S, T \subset \Omega^Q$$

Let  $S$  and  $T$  be two sets of groups, s.t.,  $S \subseteq T$ . Let,  $SS = \text{supp}(\cup_{j \in S} G_j)$  and  $TT = \text{supp}(\cup_{j \in T} G_j)$ . Then,  $SS \subseteq TT$ . Hence,

$$\begin{aligned} z(S \cup i) - z(S) &= \sum_{\ell \in SS \cup \text{supp}(G_i)} \mathbf{x}_\ell^2 - \sum_{\ell \in SS} \mathbf{x}_\ell^2 \\ &= \sum_{\ell \in \text{supp}(G_i) \setminus SS} \mathbf{x}_\ell^2 \stackrel{\zeta_1}{\geq} \sum_{\ell \in \text{supp}(G_i) \setminus TT} \mathbf{x}_\ell = z(T \cup i) - z(T), \end{aligned}$$

where  $\zeta_1$  follows from  $SS \subseteq TT$ . This completes the proof.  $\square$

This result shows that (8) can be cast as a problem of the form

$$\max_{S \subset Q} z(S), \text{ s.t. } |S| \leq k. \quad (9)$$

Algorithm 2, which details the pseudocode for performing approximate projections, exactly corresponds to the greedy algorithm for submodular optimization [1], and this gives us a means to assess the quality of our projections.

### A.1 Proof of Lemma 2.2

*Proof.* First, from the approximation property of the greedy algorithm [13],

$$\|\hat{\mathbf{u}}\|^2 \geq \left(1 - e^{-\frac{k'}{k}}\right) \|\mathbf{u}_*\|^2 \quad (10)$$

Also,  $\|\mathbf{g} - \hat{\mathbf{u}}\|^2 = \|\mathbf{g}\|^2 - \|\hat{\mathbf{u}}\|^2$  because  $(\hat{\mathbf{u}})_{\text{supp}(\hat{\mathbf{u}})} = (\mathbf{g})_{\text{supp}(\hat{\mathbf{u}})}$  and 0 otherwise.

Using the above two equations, we have:

$$\begin{aligned} \|\mathbf{g} - \hat{\mathbf{u}}\|^2 &\leq \|\mathbf{g}\|^2 - \|\mathbf{u}_*\|^2 + e^{-\frac{k'}{k}} \|\mathbf{u}_*\|^2, \\ &= \|\mathbf{g} - \mathbf{u}_*\|^2 + e^{-\frac{k'}{k}} \|\mathbf{u}_*\|^2, \\ &= \|\mathbf{g} - \mathbf{u}_*\|^2 + e^{-\frac{k'}{k}} \|(\mathbf{g})_{\text{supp}(\mathbf{u}_*)}\|^2, \end{aligned} \quad (11)$$

where both equalities above follow from the fact that due to optimality,  $(\mathbf{u}_*)_{\text{supp}(\mathbf{u}_*)} = (\mathbf{g})_{\text{supp}(\mathbf{u}_*)}$ .  $\square$

## B Proof of Theorem 3.1

*Proof.* Recall that  $\mathbf{g}_t = \mathbf{w}_t - \eta \nabla f(\mathbf{w}_t)$ ,  $\mathbf{w}_{t+1} = \widehat{P}_k^{\mathcal{G}}(\mathbf{g}_t)$ .

Let  $\text{supp}(\mathbf{w}_{t+1}) = S_{t+1}$ ,  $\text{supp}(\mathbf{w}^*) = S_*$ ,  $I = S_{t+1} \cup S_*$ , and  $M = S_* \setminus S_{t+1}$ . Also, note that  $|\text{G-supp}(I)| \leq k + k^*$ .

Moreover,  $(\mathbf{w}_{t+1})_{S_{t+1}} = (\mathbf{g}_t)_{S_{t+1}}$  (See Algorithm 2). Hence,  $\|(\mathbf{w}_{t+1} - \mathbf{g}_t)_{S_{t+1} \cup S_*}\|_2^2 = \|(\mathbf{g}_t)_M\|_2^2$ .

Now, using Lemma B.2 with  $\mathbf{z} = (\mathbf{g}_t)_I$ , we have:

$$\begin{aligned} \|(\mathbf{w}_{t+1} - \mathbf{g}_t)_I\|_2^2 &= \|(\mathbf{g}_t)_M\|_2^2 \stackrel{\zeta_1}{\leq} \frac{k^*}{k - \widetilde{k}} \cdot \|(\mathbf{g}_t)_{S_{t+1} \setminus S_*}\|_2^2 + \frac{k^* \epsilon}{k - \widetilde{k}}, \\ &\stackrel{\zeta_2}{\leq} \frac{k^*}{k - \widetilde{k}} \cdot \|(\mathbf{w}^* - \mathbf{g}_t)_I\|_2^2 + \frac{k^* \epsilon}{k - \widetilde{k}}, \end{aligned} \quad (12)$$

where  $\zeta_1$  follows from  $M \subset S_*$  and hence  $|\text{G-supp}(M)| \leq |\text{G-supp}(S_*)| = k^*$ .  $\zeta_2$  follows since  $\mathbf{w}_{S_{t+1} \setminus S_*}^* = 0$ .

Now, using the fact that  $\|(\mathbf{w}_{t+1} - \mathbf{w}^*)_I\|_2 = \|\mathbf{w}_{t+1} - \mathbf{w}^*\|_2$  along with triangle inequality, we have:

$$\begin{aligned} &\|\mathbf{w}_{t+1} - \mathbf{w}^*\|_2 \\ &\leq \left(1 + \sqrt{\frac{k^*}{k - \widetilde{k}}}\right) \cdot \|(\mathbf{w}^* - \mathbf{g}_t)_I\|_2 + \sqrt{\frac{k^* \epsilon}{k - \widetilde{k}}}, \\ &\stackrel{\zeta_1}{\leq} \left(1 + \sqrt{\frac{k^*}{k - \widetilde{k}}}\right) \cdot \|(\mathbf{w}^* - \mathbf{w}_t - \eta(\nabla f(\mathbf{w}^*) - \nabla f(\mathbf{w}_t)))_I\|_2 + 2\eta \|(\nabla f(\mathbf{w}^*))_{S_{t+1}}\|_2 + \sqrt{\frac{k^* \epsilon}{k - \widetilde{k}}}, \\ &\stackrel{\zeta_2}{\leq} \left(1 + \sqrt{\frac{k^*}{k - \widetilde{k}}}\right) \cdot \|(I - \eta H_{(I \cup S_t)(I \cup S_t)}(\alpha))(\mathbf{w}_t - \mathbf{w}^*)_{I \cup S_t}\|_2 + 2\eta \|(\nabla f(\mathbf{w}^*))_{S_{t+1}}\|_2 + \sqrt{\frac{k^* \epsilon}{k - \widetilde{k}}}, \\ &\stackrel{\zeta_3}{\leq} \left(1 + \sqrt{\frac{k^*}{k - \widetilde{k}}}\right) \cdot \left(1 - \frac{\alpha_{2k+k^*}}{L_{2k+k^*}}\right) \|\mathbf{w}_t - \mathbf{w}^*\|_2 + \frac{2}{L_{2k+k^*}} \|(\nabla f(\mathbf{w}^*))_{S_{t+1}}\|_2 + \sqrt{\frac{k^* \epsilon}{k - \widetilde{k}}}, \end{aligned} \quad (14)$$

where  $\alpha = c\mathbf{w}_t + (1 - c)\mathbf{w}^*$  for  $c > 0$  and  $H(\alpha)$  is the Hessian of  $f$  evaluated at  $\alpha$ .  $\zeta_1$  follows from triangle inequality,  $\zeta_2$  follows from the Mean-Value theorem and  $\zeta_3$  follows from the RSC/RSS condition and by setting  $\eta = 1/L_{2k+k^*}$ .

The theorem now follows by setting  $k = 2 \left( \left( \frac{L_{2k+k^*}}{\alpha_{2k+k^*}} \right)^2 + 1 \right) \cdot \log(\|\mathbf{w}^*\|_2/\epsilon)$  and  $\epsilon$  appropriately.  $\square$

**Lemma B.1.** Let  $\mathbf{w} = \widehat{P}_k^{\mathcal{G}}(\mathbf{g})$  and let  $S = \text{supp}(\mathbf{w})$ . Then, for every  $I$  s.t.  $S \subseteq I$ , the following holds:

$$\mathbf{w}_I = \widehat{P}_k^{\mathcal{G}}(\mathbf{g}_I).$$

*Proof.* Let  $Q = \{i_1, i_2, \dots, i_k\}$  be the  $k$ -groups selected when the greedy procedure (Algorithm 2) is applied to  $\mathbf{g}$ . Then,

$$\|\mathbf{w}_{G_{i_j} \setminus (\cup_{1 \leq \ell \leq j-1} G_{i_\ell})}\|_2^2 \geq \|\mathbf{w}_{G_i \setminus (\cup_{1 \leq \ell \leq j-1} G_{i_\ell})}\|_2^2, \quad \forall 1 \leq j \leq k, \quad \forall i \notin Q.$$

Moreover, the greedy selection procedure is **deterministic**. Hence, even if groups  $G_i$  are restricted to lie in a subset of  $\mathcal{G}$ , the output of the procedure remains exactly the same.  $\square$

**Lemma B.2.** Let  $\mathbf{z} \in \mathbb{R}^p$  be any vector. Let  $\widehat{\mathbf{w}} = \widehat{P}_k^{\mathcal{G}}(\mathbf{z})$  and let  $\mathbf{w}^* \in \mathbb{R}^p$  be s.t.  $|\text{G-supp}(\mathbf{w}^*)| \leq k^*$ . Let  $S = \text{supp}(\widehat{\mathbf{w}})$ ,  $S_* = \text{supp}(\mathbf{w}^*)$ ,  $I = S \cup S_*$ , and  $M = S_* \setminus S$ . Then, the following holds:

$$\frac{\|\mathbf{z}_M\|_2^2}{k^*} - \frac{\epsilon}{k - \widetilde{k}} \leq \frac{\|\mathbf{z}_{S \setminus S_*}\|_2^2}{k - \widetilde{k}},$$

where  $\widetilde{k} = O(k^* \log(\|\mathbf{w}^*\|_2/\epsilon))$ .

*Proof.* Recall that the  $k$  groups are added greedily to form  $S = \text{supp}(\hat{\mathbf{w}})$ . Let  $Q = \{i_1, i_2, \dots, i_k\}$  be the  $k$ -groups selected when the greedy procedure (Algorithm 2) is applied to  $\mathbf{z}$ . Then,

$$\|\mathbf{z}_{G_{i_j} \setminus (\cup_{1 \leq \ell \leq j-1} G_{i_\ell})}\|_2^2 \geq \|\mathbf{z}_{G_{i_j} \setminus (\cup_{1 \leq \ell \leq j-1} G_{i_\ell})}\|_2^2, \quad \forall 1 \leq j \leq k, \quad \forall i \notin Q.$$

Now, as  $\cup_{1 \leq \ell \leq j-1} G_{i_\ell} \subseteq S$ ,  $\forall 1 \leq j \leq k$ , we have:

$$\|\mathbf{z}_{G_{i_j} \setminus (\cup_{1 \leq \ell \leq j-1} G_{i_\ell})}\|_2^2 \geq \|\mathbf{z}_{G_{i_j} \setminus S}\|_2^2, \quad \forall 1 \leq j \leq k, \quad \forall i \notin Q.$$

Let  $\text{G-supp}(\mathbf{w}^*) = \{\ell_1, \dots, \ell_{k^*}\}$ . Then, adding the above inequalities for each  $\ell_j$  s.t.  $\ell_j \notin Q$ , we get:

$$\|\mathbf{z}_{G_{i_j} \setminus (\cup_{1 \leq \ell \leq j-1} G_{i_\ell})}\|_2^2 \geq \frac{\|\mathbf{z}_{S^* \setminus S}\|_2^2}{k^*}, \quad (15)$$

where the above inequality also uses the fact that  $\sum_{\ell_j \in \text{G-supp}(\mathbf{w}^*), \ell_j \notin Q} \|\mathbf{z}_{G_{\ell_j} \setminus S}\|_2^2 \geq \|\mathbf{z}_{S^* \setminus S}\|_2^2$ .

Adding (15)  $\forall (\tilde{k} + 1) \leq j \leq k$ , we get:

$$\|\mathbf{z}_S\|_2^2 - \|\mathbf{z}_B\|_2^2 \geq \frac{k - \tilde{k}}{k^*} \cdot \|\mathbf{z}_{S^* \setminus S}\|_2^2, \quad (16)$$

where  $B = \cup_{1 \leq j \leq \tilde{k}} G_{i_j}$ .

Moreover using Lemma 2.2 and the fact that  $|\text{G-supp}(\mathbf{z}_{S^*})| \leq k^*$ , we get:  $\|\mathbf{z}_B\|_2^2 \geq \|\mathbf{z}_{S^*}\|_2^2 - \epsilon$ . Hence,

$$\frac{\|\mathbf{z}_M\|_2^2}{k^*} \leq \frac{\|\mathbf{z}_S\|_2^2 - \|\mathbf{z}_B\|_2^2}{k - \tilde{k}} \leq \frac{\|\mathbf{z}_S\|_2^2 - \|\mathbf{z}_{S^*}\|_2^2 + \epsilon}{k - \tilde{k}} \leq \frac{\|\mathbf{z}_{S \setminus S^*}\|_2^2 + \epsilon}{k - \tilde{k}}. \quad (17)$$

Lemma now follows by a simple manipulation of the above given inequality.  $\square$

### C Proof of Lemma 3.3

*Proof.* Note that,

$$\|X\mathbf{w}\|_2^2 = \sum_i (\mathbf{x}_i^T \mathbf{w})^2 = \sum_i (\mathbf{z}_i^T \Sigma^{1/2} \mathbf{w})^2 = \|Z \Sigma^{1/2} \mathbf{w}\|_2^2,$$

where  $Z \in \mathbb{R}^{n \times p}$  s.t. each row  $\mathbf{z}_i \sim N(0, I)$  is a standard multivariate Gaussian. Now, using Theorem 1 of [4], and using the fact that  $\Sigma^{1/2} \mathbf{w}$  lies in a union of  $\binom{M}{k}$  subspaces each of at most  $s$  dimensions, we have (w.p.  $\geq 1 - 1/(M^k \cdot 2^s)$ ):

$$\left(1 - \frac{4}{\sqrt{C}}\right) \|\Sigma^{1/2} \mathbf{w}\|_2^2 \leq \frac{1}{n} \|Z \Sigma^{1/2} \mathbf{w}\|_2^2 \leq \left(1 + \frac{4}{\sqrt{C}}\right) \|\Sigma^{1/2} \mathbf{w}\|_2^2.$$

The result follows by using the definition of  $\sigma_{\min}$  and  $\sigma_{\max}$ .  $\square$

### D Proof of Theorem 3.4

*Proof.* Recall that  $\mathbf{g}_t = \mathbf{w}_t - \eta \nabla f(\mathbf{w}_t)$ ,  $\mathbf{w}_{t+1} = P_k^G(\mathbf{g}_t)$ . Similar to the proof of Theorem 3.1 (Appendix B), we define  $S_{t+1} = \text{supp}(\mathbf{w}_{t+1})$ ,  $S_t = \text{supp}(\mathbf{w}_t)$ ,  $S_* = \text{supp}(\mathbf{w}^*)$ ,  $I = S_{t+1} \cup S_*$ ,  $J = I \cup S_t$ , and  $M = S_* \setminus S_{t+1}$ . Also, note that  $|\text{G-supp}(I)| \leq k + k^*$ ,  $|\text{G-supp}(J)| \leq 2k + k^*$ .

Now, using Lemma D.1 with  $\mathbf{z} = (\mathbf{g}_t)_I$ , we have:  $\|(\mathbf{w}_{t+1} - \mathbf{g}_t)_I\|_2^2 \leq \frac{k^*}{k} \cdot \|(\mathbf{w}^* - \mathbf{g}_t)_I\|_2^2$ . This follows from noting that  $M = k + k^*$  here. Now, the remaining proof follows proof of Theorem 3.1

closely. That is, using the above inequality with triangle inequality, we have:

$$\begin{aligned}
& \|\mathbf{w}_{t+1} - \mathbf{w}^*\|_2 \\
& \leq \left(1 + \sqrt{\frac{k^*}{k}}\right) \cdot \|(\mathbf{w}^* - \mathbf{g}_t)_I\|_2 \\
& \stackrel{\zeta_1}{\leq} \left(1 + \sqrt{\frac{k^*}{k}}\right) \cdot \|(\mathbf{w}^* - \mathbf{w}_t - \eta(\nabla f(\mathbf{w}^*) - \nabla f(\mathbf{w}_t)))_I\|_2 + 2\eta\|(\nabla f(\mathbf{w}^*))_{S_{t+1}}\|_2, \\
& \stackrel{\zeta_2}{\leq} \left(1 + \sqrt{\frac{k^*}{k}}\right) \cdot \|(I - \eta H_{J,J}(\alpha))(\mathbf{w}_t - \mathbf{w}^*)_J\|_2 + 2\eta\|(\nabla f(\mathbf{w}^*))_{S_{t+1}}\|_2, \\
& \stackrel{\zeta_3}{\leq} \left(1 + \sqrt{\frac{k^*}{k}}\right) \cdot \left(1 - \frac{\alpha_{2k+k^*}}{L_{2k+k^*}}\right) \|\mathbf{w}_t - \mathbf{w}^*\|_2 + \frac{2}{L_{2k+k^*}}\|(\nabla f(\mathbf{w}^*))_{S_{t+1}}\|_2,
\end{aligned} \tag{18}$$

where  $\alpha = c\mathbf{w}_t + (1-c)\mathbf{w}^*$  for a  $c > 0$  and  $H(\alpha)$  is the Hessian of  $f$  evaluated at  $\alpha$ .  $\zeta_1$  follows from triangle inequality,  $\zeta_2$  follows from the Mean-Value theorem and  $\zeta_3$  follows from the RSC/RSS condition and by setting  $\eta = 1/L_{2k+k^*}$ .

The theorem now follows by setting  $k = 2 \cdot \left(\frac{L_{2k+k^*}}{\alpha_{2k+k^*}}\right)^2$ .  $\square$

**Lemma D.1.** *Let  $\mathbf{z} \in \mathbb{R}^p$  be such that it is spanned by  $M$  groups and let  $\hat{\mathbf{w}} = P_k^{\mathcal{G}}(\mathbf{z})$ ,  $\mathbf{w}^* = P_{k^*}^{\mathcal{G}}(\mathbf{z})$  where  $k \geq k^*$  and  $\mathcal{G} = \{G_1, \dots, G_M\}$ . Then, the following holds:*

$$\|\hat{\mathbf{w}} - \mathbf{z}\|_2^2 \leq \left(\frac{M-k}{M-k^*}\right) \|\mathbf{w}^* - \mathbf{z}\|_2^2.$$

*Proof.* Let  $S = \text{supp}(\hat{\mathbf{w}})$  and  $S_* = \text{supp}(\mathbf{w}^*)$ . Since  $\hat{\mathbf{w}}$  is a projection of  $\mathbf{z}$ ,  $\hat{\mathbf{w}}_S = \mathbf{z}_S$  and 0 otherwise. Similarly,  $\mathbf{w}_{S_*}^* = \mathbf{z}_{S_*}$ . So, to prove the lemma we need to show that:

$$\|\mathbf{z}_{\bar{S}}\|_2^2 \leq \left(\frac{M-k}{M-k^*}\right) \|\mathbf{z}_{\bar{S}_*}\|_2^2. \tag{19}$$

We first construct a group-support set  $A$ : we first initialize  $A = \{B\}$ , where  $B = \text{supp}(\mathbf{w}^*)$ . Next, we iteratively add  $k-k^*$  groups greedily to form  $A$ . That is,  $A = A \cup A_i$  where  $A_i = \text{supp}(P_1^{\mathcal{G}}(\mathbf{z}_{\bar{A}}))$ .

Let  $\tilde{\mathbf{w}} \in \mathbb{R}^p$  be such that  $\tilde{\mathbf{w}}_A = \mathbf{z}_A$  and  $\tilde{\mathbf{w}}_{\bar{A}} = 0$ , where  $\bar{A}$  denotes the complement of  $A$ . Also, recall that  $\|\mathbf{z}_S\|_0^{\mathcal{G}} = \|\mathbf{z}_{\text{supp}(\hat{\mathbf{w}})}\|_0^{\mathcal{G}} \leq |A| = k$ . Then, using the optimality of  $\hat{\mathbf{w}}$ , we have:

$$\|\mathbf{z}_{\bar{S}}\|_2^2 \leq \|\mathbf{z}_{\bar{A}}\|_2^2. \tag{20}$$

Now,

$$\frac{\|\mathbf{z}_{\bar{B}}\|_2^2}{M-k^*} - \frac{\|\mathbf{z}_{\bar{A}}\|_2^2}{M-k} = \frac{1}{M-k^*} \|\mathbf{z}_{\bar{B} \setminus \bar{A}}\|_2^2 - \frac{k-k^*}{(M-k^*)(M-k)} \|\mathbf{z}_{\bar{A}}\|_2^2. \tag{21}$$

By construction,  $\bar{B} \setminus \bar{A} = \cup_{i=1}^{k-k^*} A_i$ . Moreover,  $\bar{A}$  is spanned by at most  $M-k$  groups. Since,  $A_i$ 's are constructed greedily, we have:  $\|\mathbf{z}_{A_i}\|_2^2 \geq \frac{\|\mathbf{z}_{\bar{A}}\|_2^2}{M-k}$ . Adding the above equation for all  $1 \leq i \leq k-k^*$ , we get:

$$\|\mathbf{z}_{\bar{B} \setminus \bar{A}}\|_2^2 = \sum_{i=1}^{k-k^*} \|\mathbf{z}_{A_i}\|_2^2 \geq \frac{k-k^*}{M-k} \|\mathbf{z}_{\bar{A}}\|_2^2. \tag{22}$$

Using (20), (21), and (22), we get:  $\frac{\|\mathbf{z}_{\bar{B}}\|_2^2}{M-k^*} - \frac{\|\mathbf{z}_{\bar{S}}\|_2^2}{M-k} \geq 0$ . That is, (19) holds. Hence proved.  $\square$

## E Proof of Theorem 4.1

First, we provide a general result that extracts out the key property of the approximate projection operator that is required by our proof. We then show that Algorithm 3 satisfies that property.

In particular, we assume that there is a set of supports  $\mathcal{S}_{k^*}$  such that  $\text{supp}(\mathbf{w}^*) \in \mathcal{S}_{k^*}$ . Also, let  $\mathcal{S}_k \subseteq \{0, 1\}^p$  be s.t.  $\mathcal{S}_{k^*} \subseteq \mathcal{S}_k$ . Moreover, for any given  $\mathbf{z} \in \mathbb{R}^p$ , there exists an efficient procedure to find  $S \in \mathcal{S}_k$  s.t. the following holds for all  $S_* \in \mathcal{S}_{k^*}$ :

$$\|\mathbf{z}_{S \setminus S_*}\|_2^2 \leq \frac{k^*}{k} \cdot \beta_\epsilon \|\mathbf{z}_{S_* \setminus S}\|_2^2 + \epsilon, \quad (23)$$

where  $\epsilon > 0$  and  $\beta_\epsilon$  is a function of  $\epsilon$ .

We now show that (23) holds for the SoG case, specifically Algorithm 3. For simplicity, we provide the result for non-overlapping case; for overlapping groups a similar result can be obtained by combining the following lemma, with Lemma B.2.

**Lemma E.1.** *Let  $\mathcal{G} = \{G_1, \dots, G_M\}$  be  $M$  non-overlapping groups. Let  $G\text{-supp}(\mathbf{w}^*) = \{i_1^*, \dots, i_{k^*}^*\}$ . Let  $G$  be the groups selected using Algorithm 3 applied to  $\mathbf{z} \in \mathbb{R}^p$  and let  $S_i$  be the selected set of co-ordinates from group  $G_i$  where  $i \in G$ . Let  $S = \cup_i S_i$ , and let  $S_* = \cup_i (S_*)_i = \text{supp}(\mathbf{w}^*)$ . Also, let  $G^*$  be the set of groups that contains  $S_*$ . Then, the following holds:*

$$\|\mathbf{z}_{S \setminus S_*}\|_2^2 \leq \max\left(\frac{k_1^*}{k_1}, \frac{k_2^*}{k_2}\right) \cdot \|\mathbf{z}_{S^* \setminus S}\|_2^2.$$

*Proof.* Consider group  $G_i$  s.t.  $i \in G \cap G^*$ . Now, in a group we just select elements  $S_i$  by the standard hard thresholding. Hence, using Lemma 1 from [10], we have:

$$\|\mathbf{z}_{(S_*)_i \setminus S}\|_2^2 \geq \frac{k_2}{k_2^*} \|\mathbf{z}_{S \setminus (S_*)_i}\|_2^2, \forall i \in G \cap G^*. \quad (24)$$

Due to greedy selection, for each  $G_i, G_j$  s.t.  $i \in G \setminus G^*$  and  $j \in G^* \setminus G$ , we have:

$$\sum_{i \in G \setminus G^*} \|\mathbf{z}_{S_i}\|_2^2 \geq \frac{|G \setminus G^*|}{|G^* \setminus G|} \sum_{j \in G^* \setminus G} \|\mathbf{z}_{S_j}\|_2^2.$$

That is,

$$\sum_{i \in G \setminus G^*} \|\mathbf{z}_{S_i}\|_2^2 \geq \frac{k_1}{k_1^*} \sum_{j \in G^* \setminus G} \|\mathbf{z}_{S_j}\|_2^2. \quad (25)$$

The lemma now follows by adding (24) and (25), and rearranging the terms.  $\square$

Now, we prove Theorem 4.1

*Proof.* Theorem follows directly from proof of Theorem 3.1, but with (12) replaced by the following equation:

$$\|(\mathbf{w}_{t+1} - \mathbf{g}_t)_I\|_2^2 = \|(\mathbf{g}_t)_M\|_2^2 \stackrel{\zeta_1}{\leq} \frac{k^*}{k} \cdot \beta_\epsilon \|(\mathbf{g}_t)_{S_{t+1} \setminus S_*}\|_2^2 + \epsilon \stackrel{\zeta_2}{\leq} \frac{k^*}{k} \cdot \beta_\epsilon \cdot \|(\mathbf{w}^* - \mathbf{g}_t)_I\|_2^2 + \epsilon, \quad (26)$$

where  $\zeta_1$  follows from the assumption given in the theorem statement.  $\zeta_2$  follows from  $\mathbf{w}_{S_{t+1} \setminus S_*}^* = 0$ .  $\square$

## F Results for the Least Squares Sparse Overlapping Group Lasso

Lemma E.1 along with Theorem 4.1 shows that for SoG case, we need to project onto more than (than  $k_1^*$ ) groups and more than (than  $k_2^*$ ) number of elements in each group. In particular, we select  $k_i \approx (\frac{L_{2k+k^*}}{\alpha_{2k+k^*}})^2 k_i^*$  for both  $i = 1, 2$ .

Combining the above lemma with Theorem 4.1 and a similar lemma to Lemma 3.3 also provides us with sample complexity bound for estimating  $\mathbf{w}^*$  from  $(y, X)$  s.t.  $y = X\mathbf{w}^* + \beta$ . Specifically, the sample complexity evaluates to  $n \geq \kappa^2 (k_1^* \log(M) + \kappa^2 k_1^* k_2^* \log(\max_i |G_i|))$ .

| Signal           | IHT           | GOMP  | CoGEnT       |
|------------------|---------------|-------|--------------|
| Blocks           | <b>.00029</b> | .0011 | .00066       |
| HeaviSine        | .0026         | .0029 | <b>.0021</b> |
| Piece-Polynomial | <b>.0016</b>  | .0017 | .0022        |
| Piece-Regular    | .0025         | .0039 | <b>.0015</b> |

Table 1: MSE on standard test signals using IHT with full corrections

## G Additional Experimental Evaluations

**Noisy Compressed Sensing:** Here, we apply our proposed methods in a compressed sensing framework to recover sparse wavelet coefficients of signals. We used the standard “test” signals (Table 1) of length 2048, and obtained 512 Gaussian measurements. We set  $k = 100$  for IHT and GOMP. IHT is competitive (in terms of accuracy) with the state of the art in convex methods, while being significantly faster. Figure 3 shows the recovered blocks signal using IHT. All parameters were picked clairvoyantly via a grid search.

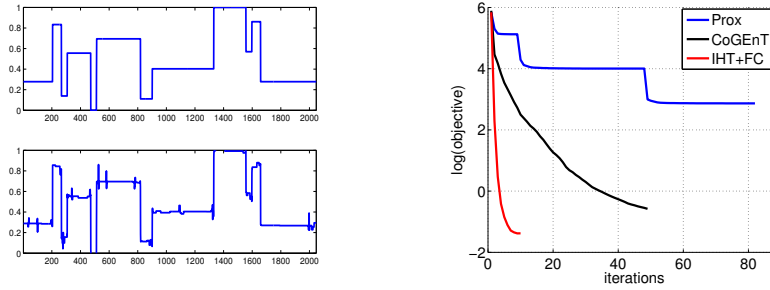

Figure 3: Wavelet Transform recovery of 1-D test signals. (Left) The ‘blocks’ signal and recovery using IHT + Greedy projections. (Right) Objective function vs iterations on the ‘blocks’ signal.
